# Supplementary material for: Effect of high-dose cyclophosphamide on ultrastructural changes and gene expression profiles in cardiomyocytes of C57BL/6J mice
Source: Research Square preprint supplement (doi:10.21203/rs.3.rs-1629925/v1), 2022-05-18
Supplement: Supplementary file 1 [file e7d1e067fa25c8b29d2f4cf7.docx]

**Table 1**

C57BL/6J mice treated with CY: 20 most up- and down-regulated genes of 52,142 genes examined.

Up-regulated

| Gene Symbol Acc# Z score Gene name |
| --- |

Hmox1 NM_010442 9.075 Heme oxygenase 1

Hamp NM_032541 8.900 Hepcidin antimicrobial peptide

Mt2 NM_008630 8.579 Metallothionein 2

Serpina3n NM_009252 8.301 Serine (or cysteine) peptidase inhibitor

clade A, member 3N

Dmkn NM_001166173 7.662 Dermokine, transcript variant 3

Cd207 NM_144943 7.595 CD207 antigen

Dkk3 NM_015814 7.498 Dickkopf WNT signaling pathway

inhibitor 3, transcript variant 2

Mlana XM_011247400 7.345 Melan-A

Sfrp5 NM_018780 7.028 Secreted frizzled-related sequence

protein 5

Pip5k1a AK167816 6.856 Phosphatidylinositol-4-phosphate 5-

kinase, type 1 alpha

Clec1b NM_019985 6.784 C-type lectin domain family 1, member

b, transcript variant 1

Anxa8 NM_013473 6.760 Annexin A8, transcript variant 1

Fam32a NM_026455 6.494 Family with sequence similarity 32,

member A

Gp9 NM_018762 6.430 Glycoprotein 9 (platelet)

Lgals3 NM_001145953 6.298 Lectin, galactose binding, soluble 3,

transcript variant 1

Fam183b NM_029283 6.237 Family with sequence similarity 183,

member B transcript variant 1

Clec4d NM_010819 6.155 C-type lectin domain family 4, member

d, transcript variant 1

Cntf NM_170786 6.133 Ciliary neurotrophic factor

Ppbp NM_023785 6.065 Pro-platelet basic protein

Gata2 NM_008182 5.986 Glutathione S-transferase, alpha 2

Down-regulated

| Gene Symbol Acc# Z score Gene name |
| --- |

Cx3cr1 NM_009987 -6.630 Chemokine (C-X3-C motif) receptor 1

Nckap5 NM_172484 -5.346 NCK-associated protein 5, transcript

variant 2

Aplnr NM_011784 -5.227 Apelin receptor

Apln NM_013912 -5.118 Apelin

Itga9 NM_133721 -4.791 Integrin alpha 9, transcript variant 1

Tfrc NM_011638 -4.554 Transferrin receptor, transcript variant 1

Ppargc1b NM_133249 -4.504 Peroxisome proliferative activated

receptor, gamma, coactivator 1 beta,

transcript variant 1

Akap7 XM_006512789 -4.497 A kinase (PRKA) anchor protein 7

Cops8 NM_133805 -4.479 COP9 signalosome subunit 8

Plekhh1 NM_181073 -4.462 Pleckstrin homology domain containing,

family H (with MyTH4 domain) member 1

Galnt17 NM_145218 -4.418 Polypeptide N-

acetylgalactosaminyltransferase 17

Large1 NM_010687 -4.360 LARGE xylosyl- and

glucuronyltransferase 1, transcript

variant 2

Klhdc8a NM_144810 -4.358 Kelch domain containing 8A

Kcne1 NM_008424 -4.307 Potassium voltage-gated channel, lsk-

related subfamily, member 1

Nrn1 NM_001374754 -4.275 Neuritin 1, transcript variant 2

Klra8 NM_010650 -4.228 Killer cell lectin-like receptor, subfamily

A, member 8, transcript variant 2

Ccl21a NM_011124 -4.226 Chemokine (C-C motif) ligand 21A

(serine)

Dbp NM_016974 -4.233 D site albumin promoter binding protein

Fhl2 NM_010212 -4.201 Four and a half LIM domains 2, transcript

variant 1

Tuba4a NM_009447 -4.169 Tubulin, alpha 4A, transcript variant 1

**Table 2**

Functional annotation clustering analysis of genes expressed in C57BL/6J mouse cardiac tissue at 3 hours after last administration of CY.

| **Annotation Cluster Count p value** |
| --- |

**1 (Enrichment Score: 20.72)**

Extracellular region 210 2.8×10-29

Extra cellular space 196 1.3×10-20

Signal 349 7.0×10-12

**2 (Enrichment Score: 13.13)**

Signal 349 7.0×10-12

Disulfide bond 249 2.3×10-11

Glycoprotein 345 4.9×10-11

**3 (Enrichment Score: 7.52)**

Cell junction 89 2.3×10-9

Synapse 55 4.0×10-7

**4 (Enrichment Score: 6.14)**

Dilated cardiomyopathy 21 3.1×10-7

Hypertrophic cardiomyopathy 20 8.5×10-7

Arrhythmogenic right ventricular cardiomyopathy 18 1.4×10-6

**5 (Enrichment Score: 4.00)**

Membrane 451 1.9×10-12

Plasma membrane 361 1.2×10-6

Cell membrane 237 4.8×10-5

**Table 3**

KEGG pathway functional classification of genes in C57BL/6J mouse cardiac tissue expressed 3 hours after administration of CY.

| Term Count p value |
| --- |

Dilated cardiomyopathy 21 3.1×10-7

Hypertrophic cardiomyopathy (HCM) 20 8.5×10-7

Arrhythmogenic right ventricular

Cardiomyopathy (ARVC) 　　 18 1.4×10-6

Viral protein interaction with cytokine

and cytokine receptor 20 1.7×10-6

ECM-receptor interaction 19 2.2×10-6

Focal adhesion 29 1.3×10-5

Metabolism of xenobiotics by cytochrome P450 16 1.5×10-5

Hematopoietic cell lineage 18 2.4×10-5

Fluid shear stress and atherosclerosis 23 4.1×10-5

Platinum drug resistance 16 4.6×10-5
